# Supplementary material for: Precise Prediction of Calpain Cleavage Sites and Their Aberrance Caused by Mutations in Cancer
Source: PubMed Central journal article supplement (PMC6694742; doi:10.3389/fgene.2019.00715), 2019-08-08
Supplement: Image_2.pdf [file Image_2.pdf]

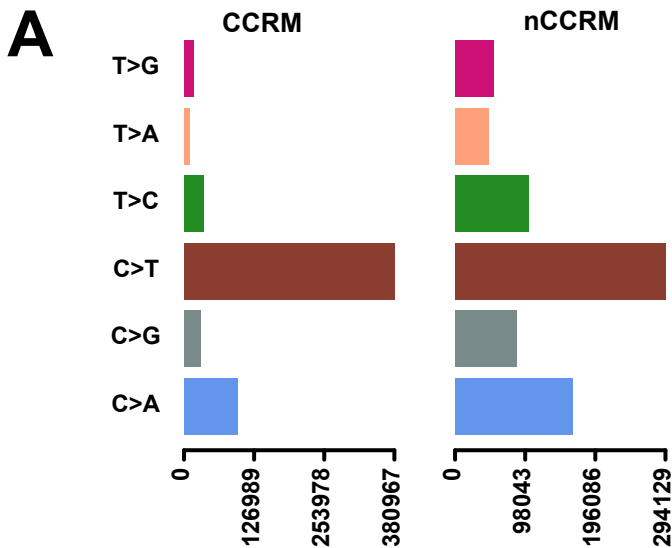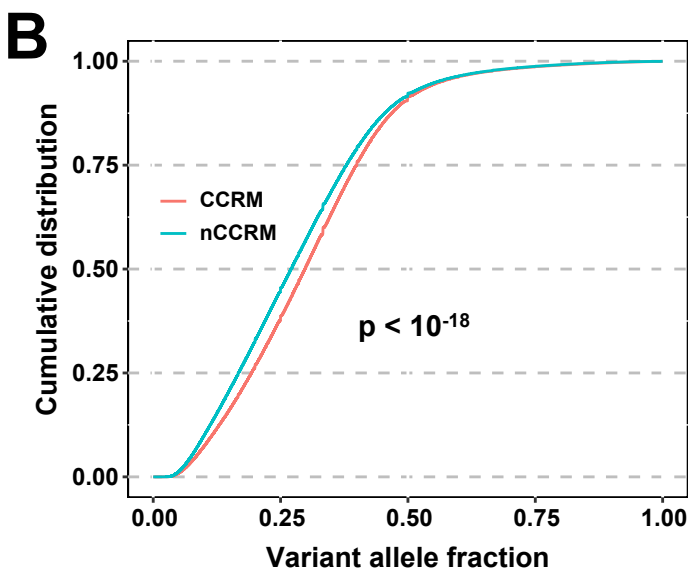

Figure S2. The different mutation pattern between CCRMs and nCCRM. (A) Counting for the different types of mutation for CCRMs and nCCRM. (B) The cumulative distribution function for the VAFs of CCRMs and nCCRM.
